# Supplementary material for: Design and Validation of a Sensitive Multisteroid LC-MS/MS Assay for the Routine Clinical Use: One-Step Sample Preparation with Phospholipid Removal and Comparison to Immunoassays
Source: MDPI journal article supplement (doi:10.3390/ijms232314691), 2022-11-24
Supplement: s1 [file s1]

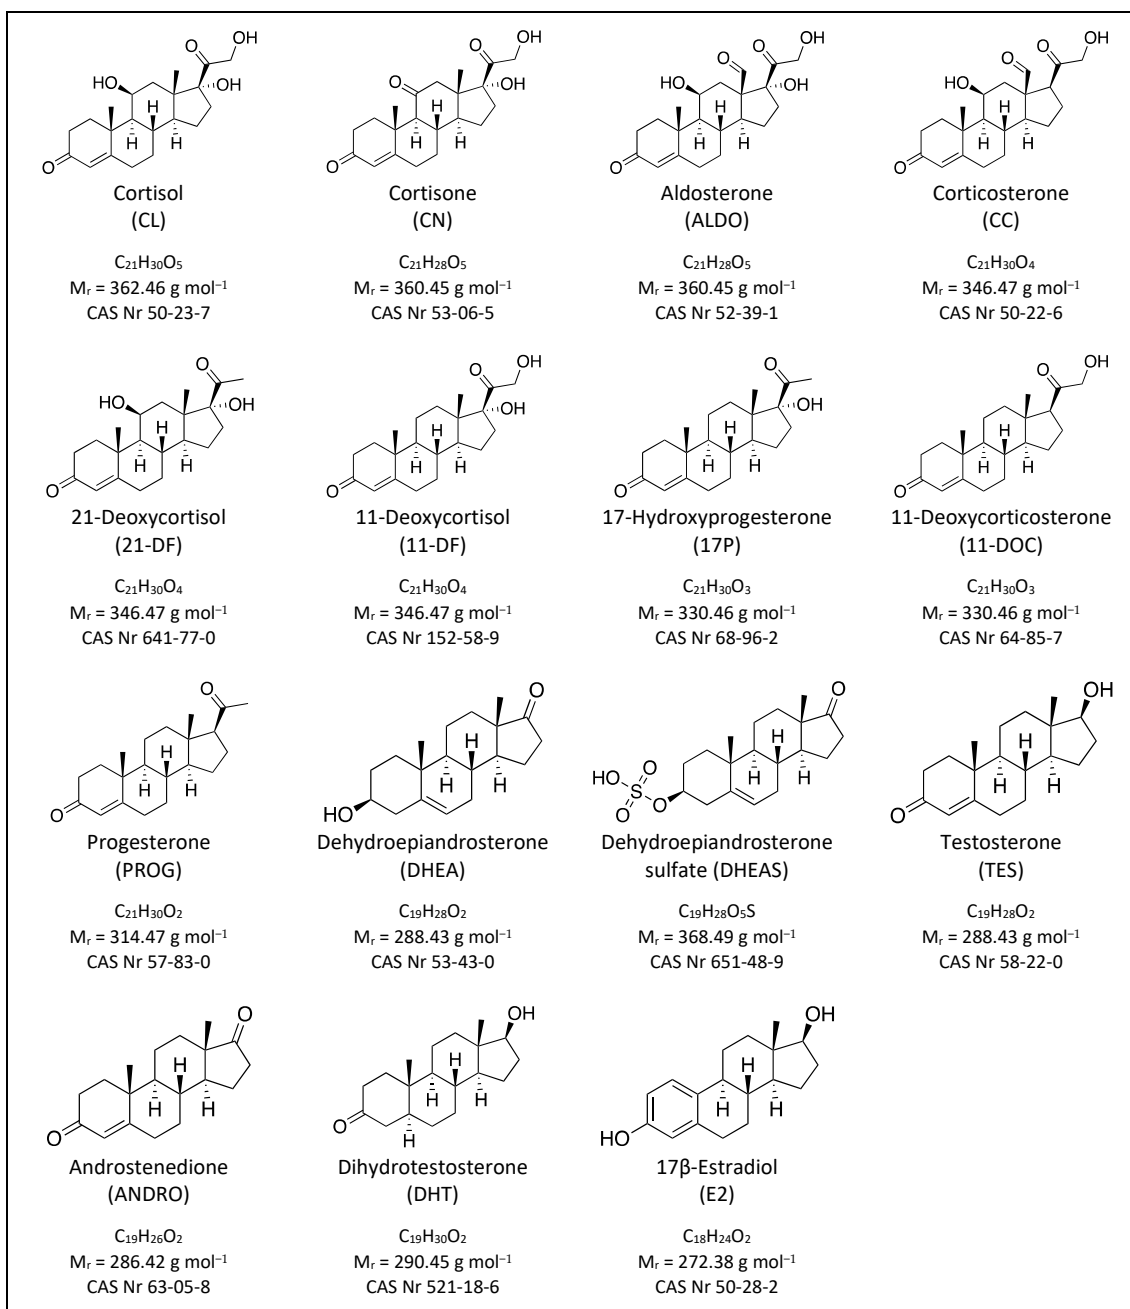

**Scheme S1.** Steroid analytes covered by the LC-MS/MS assay presented in this work. Chemical structures, sum formula, molecular weight and CAS number is depicted together with the steroid name and the abbreviation used in parenthesis.

Formula used to calculate recovery rates in different experiments are as follows:

$$\text{Recovery (\%)} = \frac{c(\text{total}) - c(\text{unspiked})}{c(\text{spike})} \times 100 \quad (\text{S1})$$

$$\text{Matrix effect (ME) \%} = \frac{B - E}{A} \times 100 \% \quad (\text{S2})$$

$$\text{Extraction recovery (ER) \%} = \frac{C}{B} \times 100 \% \quad (\text{S3})$$

$$\text{Process efficiency (PE)\%} = \frac{D - E}{A} \times 100 \% \quad (\text{S4})$$

$$\text{ME}_{(\text{IS corrected})} = \frac{\text{ME}_{(\text{analyte})}}{\text{ME}_{(\text{IS})}} \times 100 \% \quad (\text{S5})$$

$$\text{ER}_{(\text{post IS corrected})} = \frac{C_{\text{analyte}} B_{\text{IS}}}{B_{\text{analyte}} C_{(\text{IS})}} \times 100 \% \quad (\text{S6})$$

$$\text{PE}_{(\text{IS corrected})} = \frac{\text{PE}_{(\text{analyte})}}{\text{PE}_{(\text{IS})}} \times 100 \% \quad (\text{S7})$$

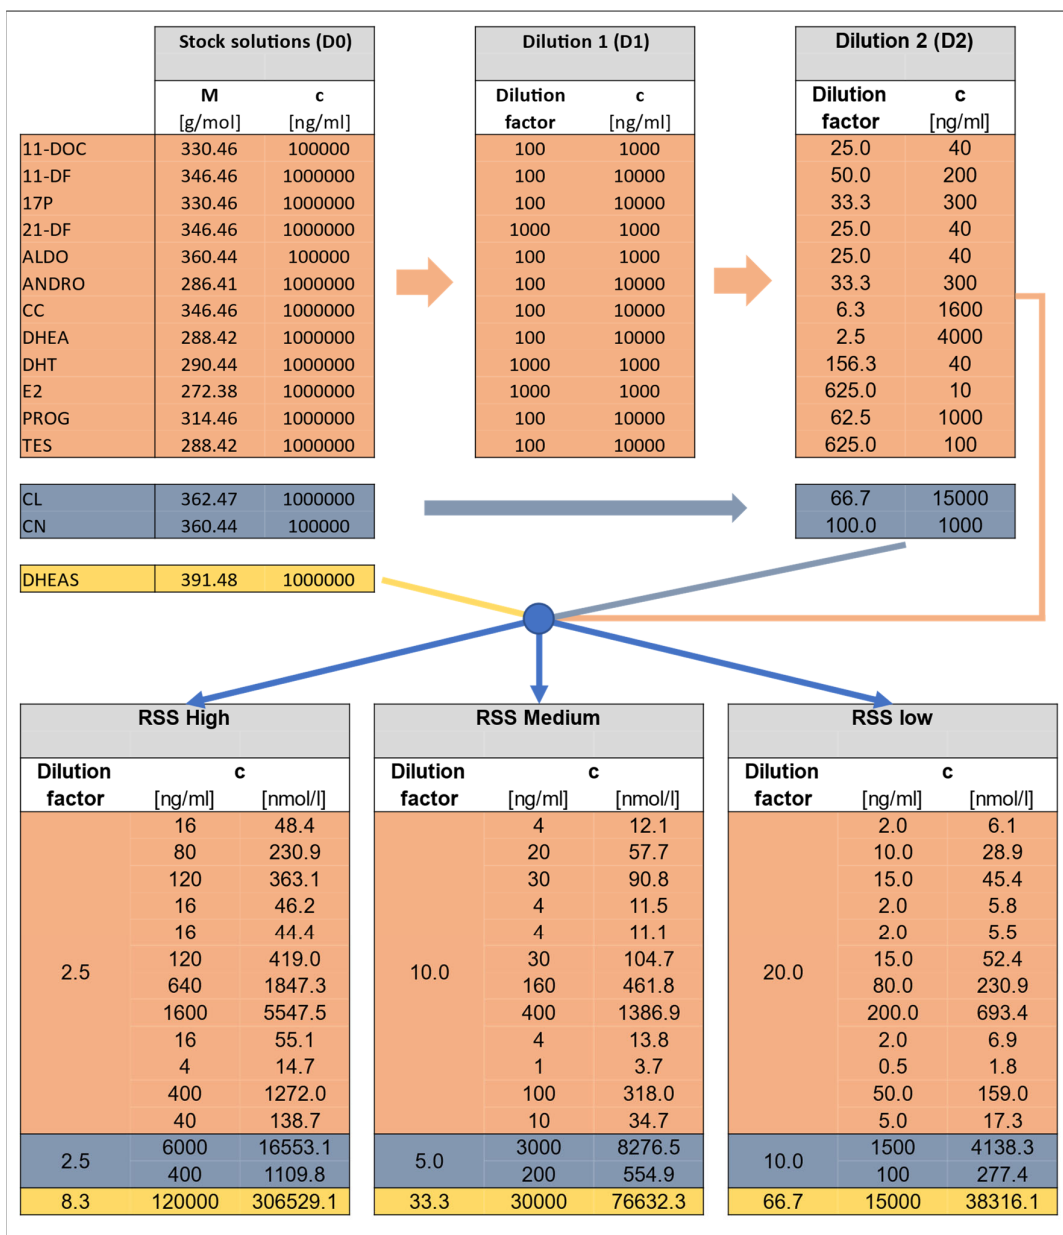

**Scheme S2.** Pipetting scheme for the creation of three levels of spiking solutions (RSS) containing all 15 analytes used for the recovery experiment. Stock solutions and dilution 1 (D1) were prepared individually for every analyte. For Dilution 2 (D2) two mixed solutions were prepared, one for multiple analytes from D1 solutions, and one for CN and CL from their stock solutions. RSS high, medium, and low were finally prepared by mixing together both D2 solutions and DHEAS stock solution at different dilution factors. 50% methanol was used as diluent in all steps.

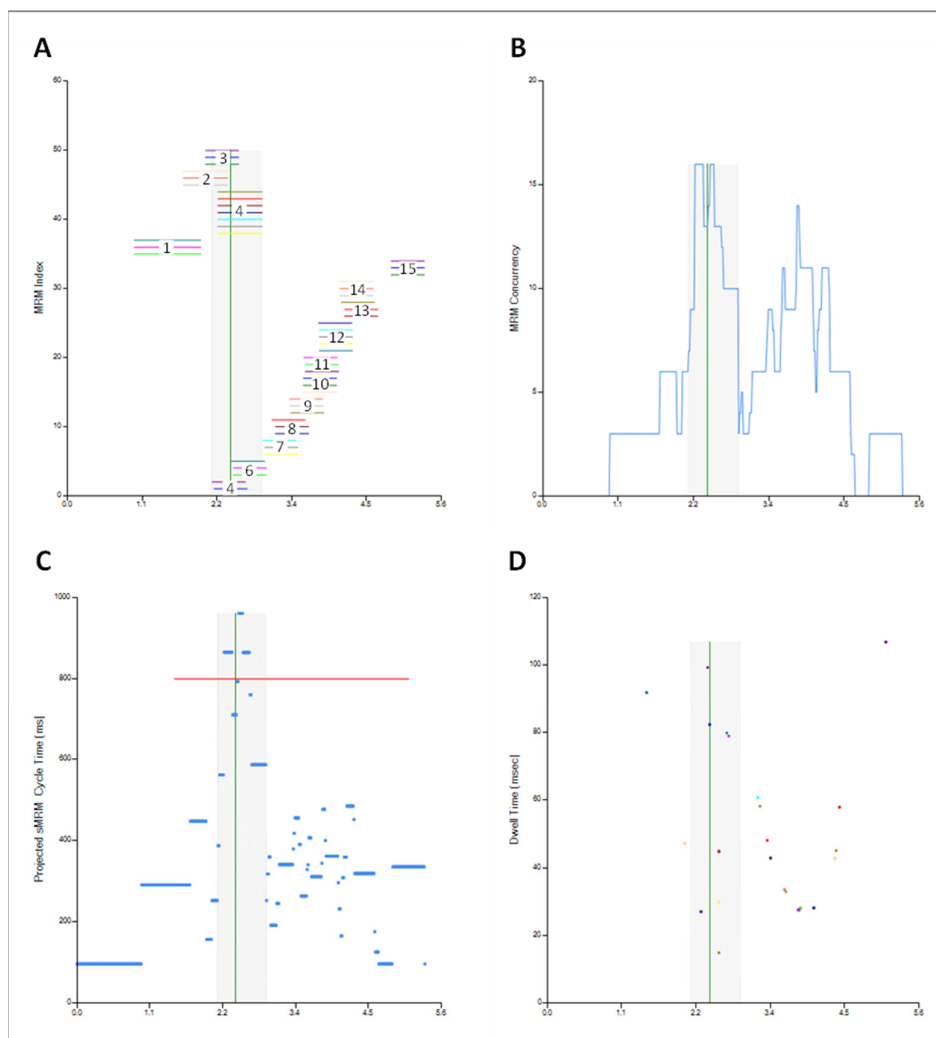

**Figure S1.** sMRM calculator tool output for 11-deoxycorticosterone (11-DOC), 11-deoxycortisol (11-DF), 17-OH-progesterone (17P), 21-deoxycortisol (21-DF), androstenedione (ANDRO), aldosterone (ALDO), corticosterone (CC), cortisol (CL), cortisone (CN), dehydroepiandrosterone (DHEA), dehydroepiandrosterone sulfate (DHEAS), dihydrotestosterone (DHT), estradiol (E2), progesterone (PROG), and testosterone (TES). **(A)** Time windows of all programmed ion transitions. Analyte numbering: 1 DHEAS; 2 CL; 3 CN; 4 21-DF; 5, 6 E2 and ALDO; 7 11-DF; 8 CC; 9 DHEA; 10,11 TES and 17P; 12 DHT; 13, 14 ANDRO and 11-DOC; 15 PROG; **(B)** number of concurrent MRM transitions; estimated cycle time **(C)** and estimated dwell times **(D)** over one run.

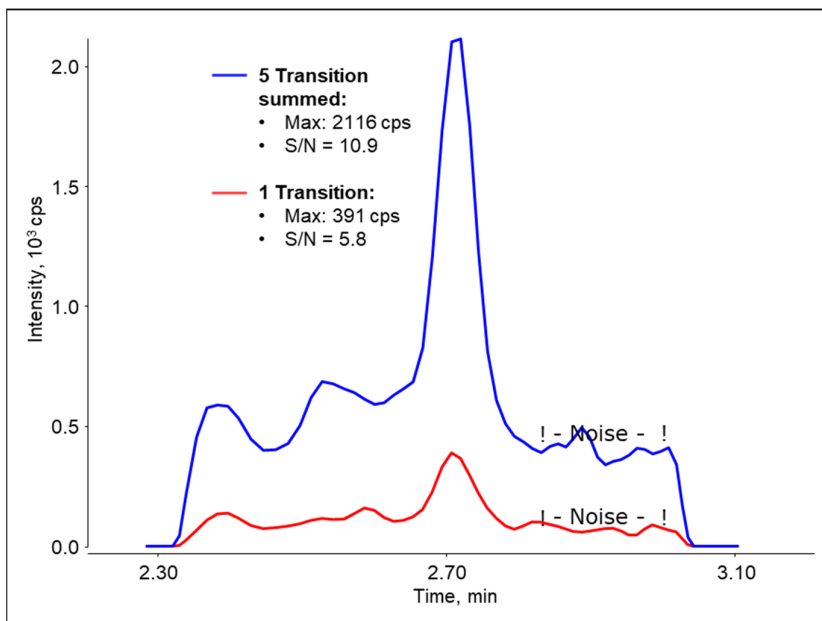

**Figure S2.** Effect of transition summing. A single ion transition chromatogram (red) overlaid with a chromatogram consisting of 5 summed transitions (blue) of the same sample (QC I 1:10, 30 pmol/L).

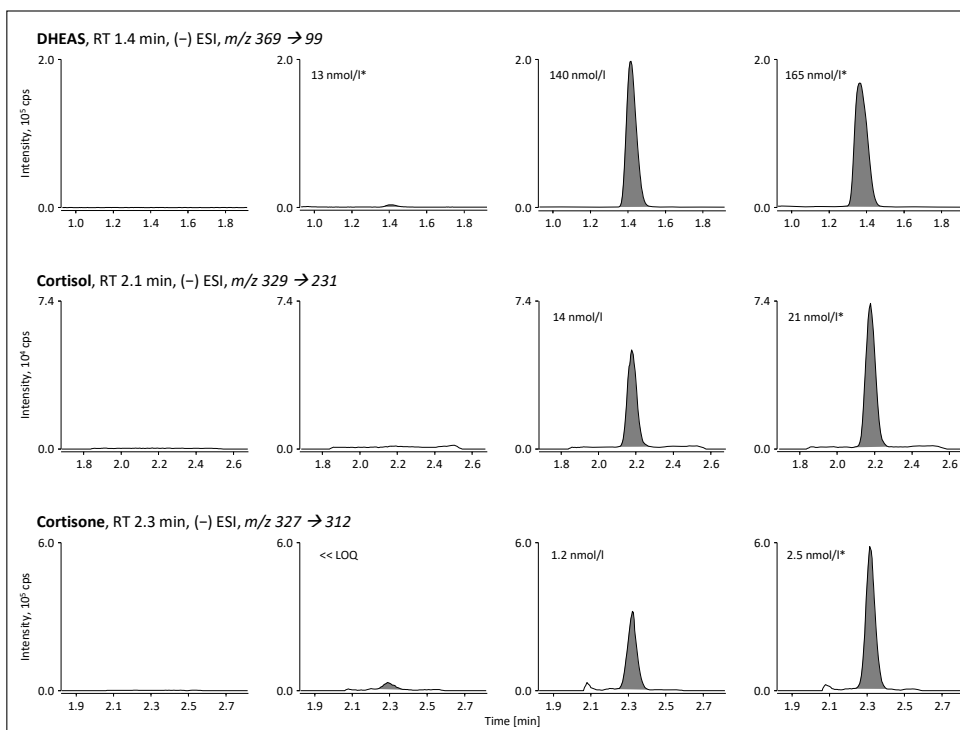

**Figure S3.** Exemplary chromatograms of the quantifier ion trace of DHEAS, cortisol, and cortisone. Analytes are arranged according to their retention time. Chromatograms show from left to right, a double blank sample (mobile phase) recorded after the highest calibrator, a blank serum sample (calibration matrix), the lowest used calibrator sample and an authentic patient serum sample with a near LLOQ concentration are depicted. Target concentrations are depicted where available, measured concentrations are marked with an asterisk.

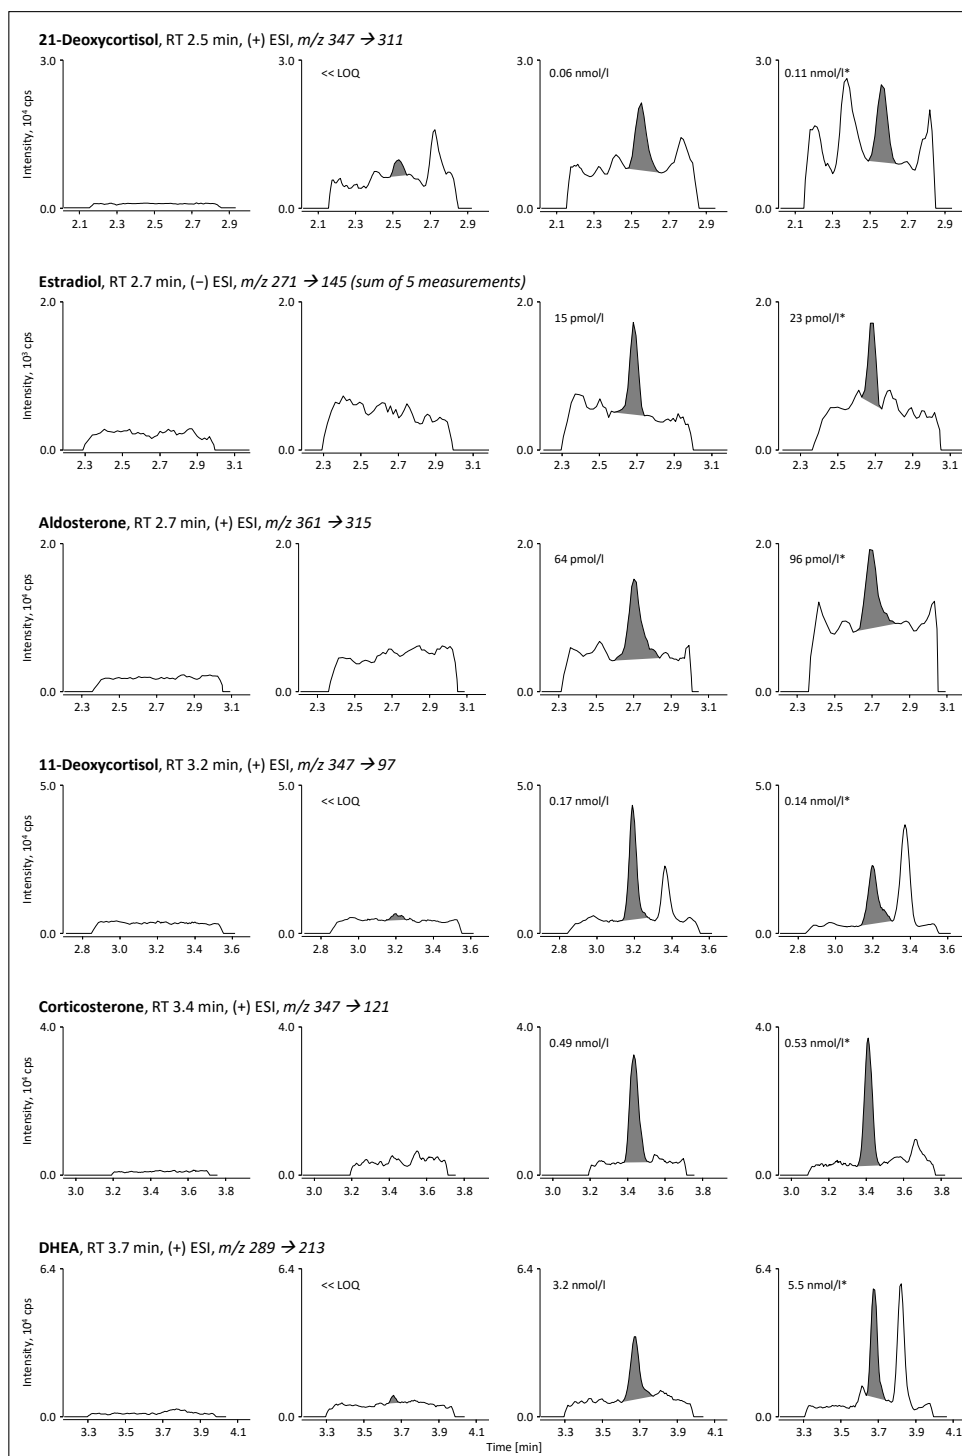

**Figure S4.** Exemplary chromatograms of the quantifier ion trace of 21-deoxycortisol, estradiol, aldosterone, 11-deoxycortisol, corticosterone, and DHEA. Analytes are arranged according to their retention time. Chromatograms show from left to right, a double blank sample (mobile phase) recorded after the highest calibrator, a blank serum sample (calibration matrix), the lowest used calibrator sample and an authentic patient serum sample with a near LLOQ concentration are depicted. Target concentrations are depicted where available, measured concentrations are marked with an asterisk.

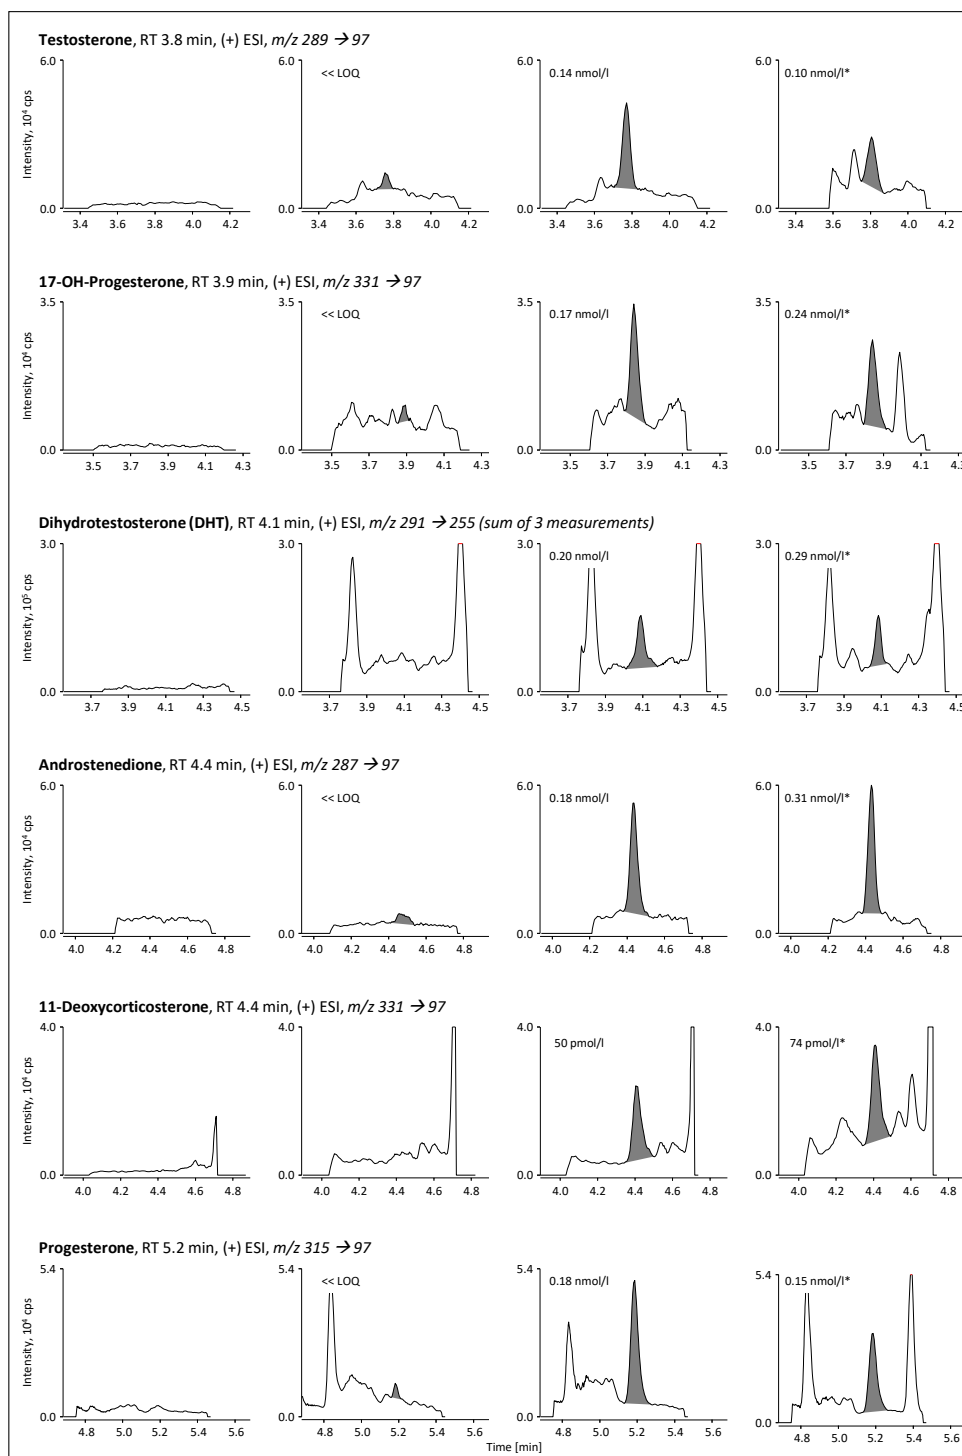

**Figure S5.** Exemplary chromatograms of the quantifier ion trace of testosterone, 17-hydroxyprogesterone, DHT, androstenedione, 11-deoxycortisone, and progesterone. Analytes are arranged according to their retention time. Chromatograms show from left to right, a double blank sample (mobile phase) recorded after the highest calibrator, a blank serum sample (calibration matrix), the lowest used calibrator sample and an authentic patient serum sample with a near LLOQ concentration are depicted. Target concentrations are depicted where available, measured concentrations are marked with an asterisk.

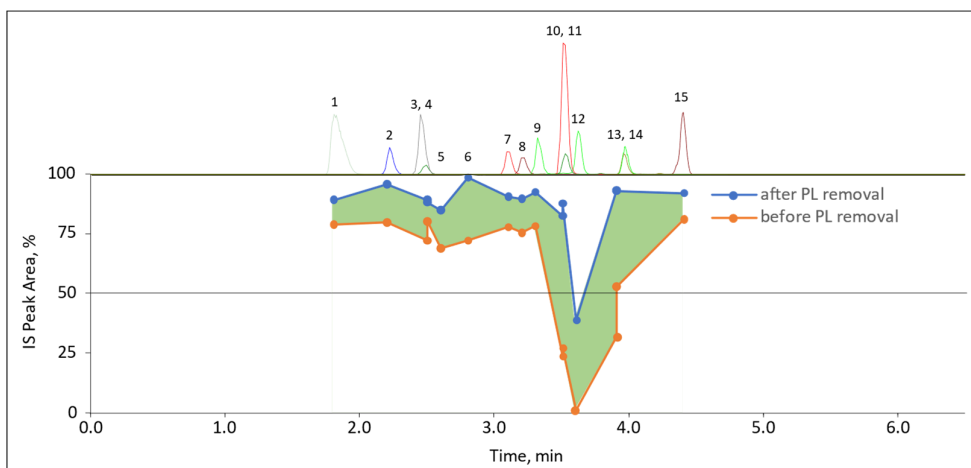

**Figure S6.** Retention-time dependent IS peak area recovery differences in serum samples before and after removal of phospholipids (PL) for the standards of 11-deoxycorticosterone (11-DOC), 11-deoxycortisol (11-DF), 17-OH-progesterone (17P), 21-deoxycortisol (21-DF), androstenedione (ANDRO), aldosterone (ALDO), corticosterone (CC), cortisol (CL), cortisone (CN), dehydroepiandrosterone (DHEA), dehydroepiandrosterone sulfate (DHEAS), dihydrotestosterone (DHT), estradiol (E2), progesterone (PROG), and testosterone (TES). Average IS peak area in calibrator samples was used as reference for recovery calculation. These data were generated from a preliminary method with shorter analysis time. An exemplary chromatogram serves as an analyte identifier for each data point. Peak labelling: 1 DHEAS; 2 CL; 3 CN; 4 21-DF; 5, 6 E2 and ALDO; 7 11-DF; 8 CC; 9 DHEA; 10,11 TES and 17P; 12 DHT; 13, 14 ANDRO and 11-DOC; 15 PROG.

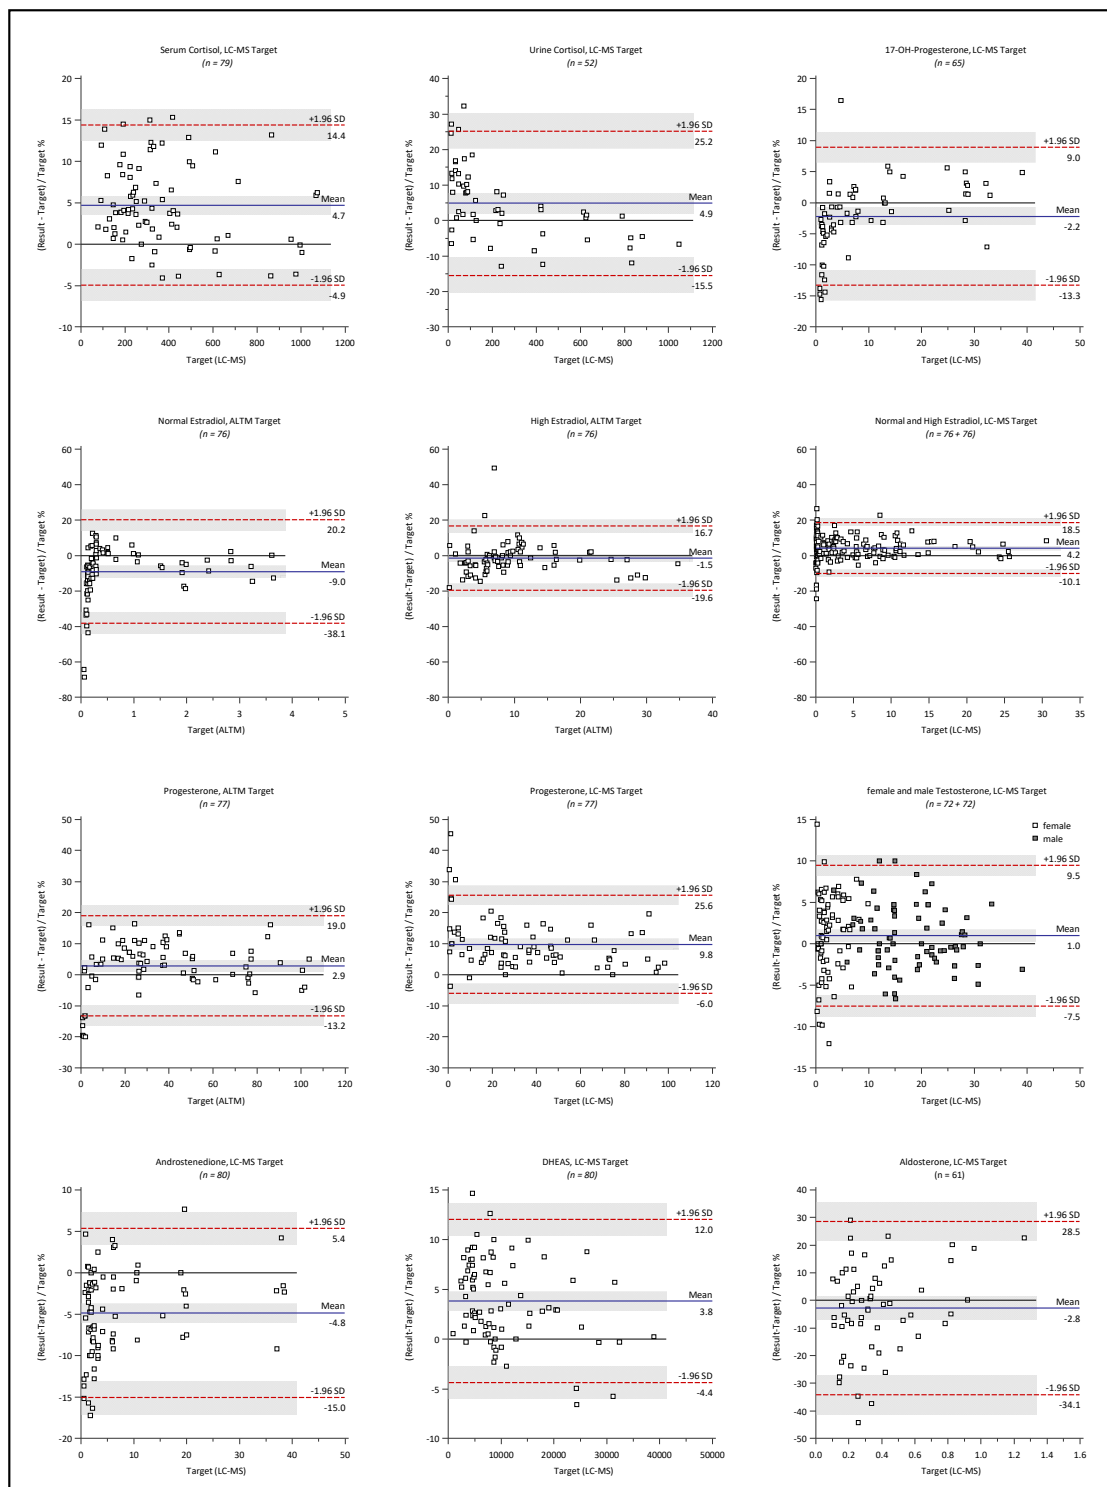

**Figure S7.** Bland and Altman plots illustrating differences found between the LC-MS/MS method results and target values of the UK-NEQAS proficiency scheme. Data of distributions 470 to 493 included.



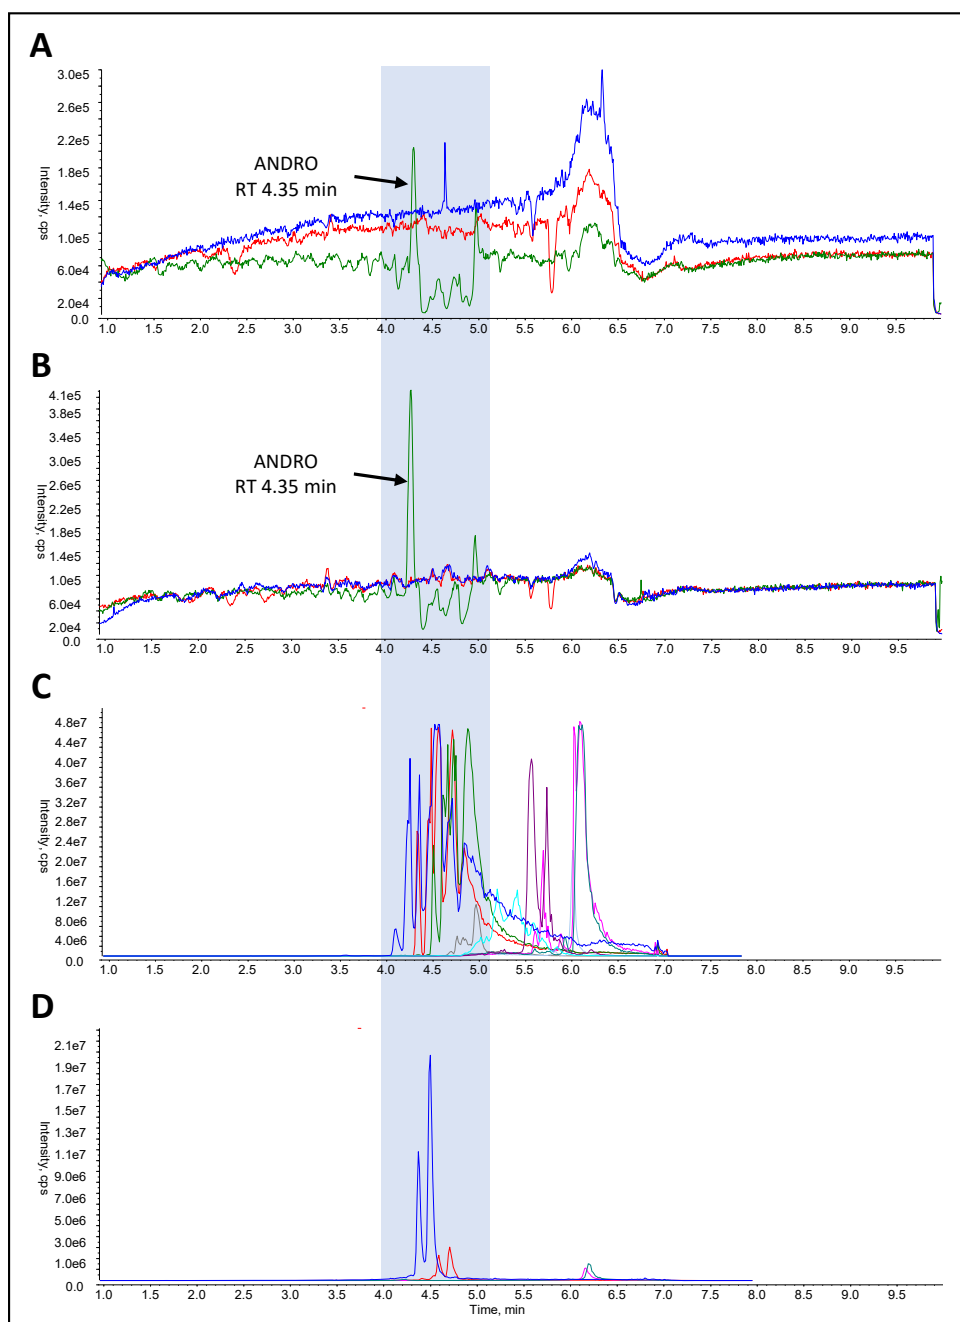

**Figure S8.** Post column infusion chromatograms of the analyte androstendione (ANDRO) of the same serum sample without (A) and with (B) the HybridSPE filtration step. Ion trace of serum sample injection is depicted in green, of QC-matrix in red and of mobile phase in blue. In chromatograms (C) and (D) results of monitoring phospholipid ion traces are shown accordingly. Retention time interval with highest signal suppression is highlighted.

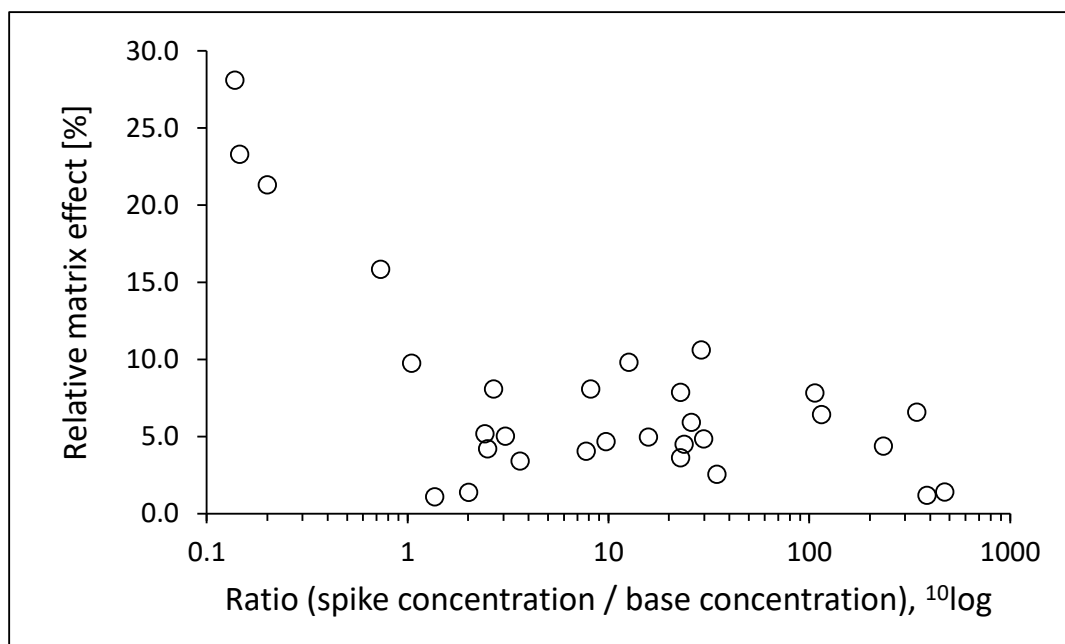

**Figure S9.** Influence of the spike-to-base concentration ratio on the relative matrix effect.

**Table S1.** Mass transitions and respective optimized MS-instrument parameters included in the method for the analytes and internal standards of 11-deoxycorticosterone (11-DOC), 11-deoxycortisol (11-DF), 17-OH-progesterone (17P), 21-deoxycortisol (21-DF), androstenedione (ANDRO), aldosterone (ALDO), corticosterone (CC), cortisol (CL), cortisone (CN), dehydroepiandrosterone (DHEA), dehydroepiandrosterone sulfate (DHEAS), dihydrotestosterone (DHT), estradiol (E2), progesterone (PROG), and testosterone (TES)..

| Substance  | RT<br>[min] | M<br>[g/mol] | Q1-Ion              | Q1<br>m/z | Quantifier |           |           | Qualifier |           |           |
|------------|-------------|--------------|---------------------|-----------|------------|-----------|-----------|-----------|-----------|-----------|
|            |             |              |                     |           | Q3<br>m/z  | DP<br>[V] | CE<br>[V] | Q3<br>m/z | DP<br>[V] | CE<br>[V] |
| DHEAS      | 1.45        | 368.5        | [M+1] <sup>-</sup>  | 369.4     | 99.0       | -60       | -28       | 81.9      | -60       | -105      |
| CL         | 2.15        | 362.5        | [M-33] <sup>-</sup> | 329.4     | 231.2      | -55       | -33       | 301.2     | -55       | -29       |
| CN         | 2.30        | 360.5        | [M-33] <sup>-</sup> | 327.4     | 312.2      | -59       | -28       | 299.1     | -59       | -28       |
| 21-DF      | 2.50        | 346.5        | [M+H] <sup>+</sup>  | 347.3     | 311.3      | 65        | 24        | 121.1     | 65        | 31        |
| E2*        | 2.68        | 272.4        | [M-1] <sup>-</sup>  | 271.3     | 145.1      | -60       | -54       | 183.1     | -60       | -55       |
| ALDO       | 2.75        | 360.5        | [M+H] <sup>+</sup>  | 361.3     | 315.2      | 56        | 28        | 343.2     | 56        | 24        |
| 11-DF      | 3.18        | 346.5        | [M+H] <sup>+</sup>  | 347.3     | 97.0       | 65        | 31        | 109.1     | 65        | 35        |
| CC         | 3.35        | 346.5        | [M+H] <sup>+</sup>  | 347.3     | 121.1      | 65        | 23        | 109.1     | 65        | 24        |
| DHEA       | 3.65        | 288.4        | [M+H] <sup>+</sup>  | 289.3     | 213.2      | 70        | 27        | 253.3     | 50        | 24        |
| TES        | 3.79        | 288.4        | [M+H] <sup>+</sup>  | 289.3     | 97.1       | 70        | 22        | 109.1     | 70        | 24        |
| 17P        | 3.84        | 330.5        | [M+H] <sup>+</sup>  | 331.3     | 97.0       | 75        | 28        | 109.1     | 75        | 33        |
| DHT *      | 4.10        | 290.5        | [M+H] <sup>+</sup>  | 291.3     | 255.3      | 55        | 22        | 159.2     | 55        | 31        |
| 11-DOC     | 4.35        | 330.5        | [M+H] <sup>+</sup>  | 331.3     | 97.0       | 75        | 28        | 109.1     | 75        | 33        |
| ANDRO      | 4.35        | 289.4        | [M+H] <sup>+</sup>  | 287.3     | 97.0       | 100       | 53        | 109.1     | 100       | 53        |
| PROG       | 5.10        | 314.5        | [M+H] <sup>+</sup>  | 315.3     | 97.1       | 40        | 20        | 109.1     | 40        | 22        |
| DHEAS-d6   | 1.45        | 374.3        | [M+1] <sup>-</sup>  | 375.4     | 99.9       | -60       | -30       |           |           |           |
| CL-d4      | 2.10        | 366.5        | [M-33] <sup>-</sup> | 333.4     | 235.2      | -55       | -33       |           |           |           |
| CN-d8      | 2.30        | 368.5        | [M-33] <sup>-</sup> | 332.4     | 317.2      | -59       | -28       |           |           |           |
| 21-DF-d8   | 2.46        | 354.5        | [M+H] <sup>+</sup>  | 355.3     | 319.0      | 65        | 24        |           |           |           |
| E2-d5      | 2.68        | 277.4        | [M-1] <sup>-</sup>  | 276.4     | 145.0      | -120      | -73       |           |           |           |
| ALDO-d4    | 2.75        | 364.5        | [M+H] <sup>+</sup>  | 365.3     | 319.2      | 56        | 28        |           |           |           |
| 11-DF-d5   | 3.18        | 351.5        | [M+H] <sup>+</sup>  | 352.3     | 100.0      | 74        | 30        |           |           |           |
| CC-d8      | 3.35        | 354.5        | [M+H] <sup>+</sup>  | 355.3     | 125.2      | 65        | 23        |           |           |           |
| DHEA-d5    | 3.65        | 293.5        | [M+H] <sup>+</sup>  | 294.3     | 218.3      | 50        | 29        |           |           |           |
| TES-d3     | 3.79        | 291.4        | [M+H] <sup>+</sup>  | 292.3     | 97.1       | 73        | 22        |           |           |           |
| DHT-d3     | 4.10        | 293.5        | [M+H] <sup>+</sup>  | 294.3     | 258.3      | 50        | 15        |           |           |           |
| 17P-13C3   | 3.84        | 333.4        | [M+H] <sup>+</sup>  | 334.3     | 100.0      | 75        | 28        |           |           |           |
| ANDRO-13C3 | 4.35        | 289.4        | [M+H] <sup>+</sup>  | 290.3     | 100.1      | 100       | 53        |           |           |           |
| 11-DOC-d8  | 4.31        | 338.5        | [M+H] <sup>+</sup>  | 339.3     | 100.1      | 55        | 28        |           |           |           |
| PROG-13C3  | 5.10        | 317.4        | [M+H] <sup>+</sup>  | 318.3     | 100.0      | 40        | 20        |           |           |           |

\* Recorded and summed (transition summing) five times. Programmed by using m/z ratios with a 0.001 u difference for the Q3 quantifier (e.g., 145.098, 145.099, 145.100, 145.101 and 145.102 for E2).

**Table S2:** Optimized ion source parameters for negative and positive mode ionization

| Parameter         | Setting       |
|-------------------|---------------|
| Curtain Gas       | 35            |
| Collision Gas     | 10 / medium § |
| Ion Spray voltage | ± 4500 V      |
| Temperature       | 500°C         |
| Ion Source Gas 1  | 55            |
| Ion Source Gas 2  | 55            |

§ depending on Analyst software version (1.6.3 / 1.7)

**Table S3:** Scheduled MRM settings and estimated dwell time for the analytes 11-deoxycorticosterone (11-DOC), 11-deoxycortisol (11-DF), 17-OH-progesterone (17P), 21-deoxycortisol (21-DF), androstenedione (ANDRO), aldosterone (ALDO), corticosterone (CC), cortisol (CL), cortisone (CN), dehydroepiandrosterone (DHEA), dehydroepiandrosterone sulfate (DHEAS), dihydrotestosterone (DHT), estradiol (E2), progesterone (PROG), and testosterone (TES).

| Analyte                    | Retention time<br>[min] | Time Window<br>[s] | Target cycle time<br>[s] | Estimated dwell time <sup>s</sup><br>[ms] |
|----------------------------|-------------------------|--------------------|--------------------------|-------------------------------------------|
| Positive ionization        |                         |                    |                          |                                           |
| 21-DF                      | 2.45                    | 40                 | 0.4                      | 75                                        |
| ALDO                       | 2.75                    | 40                 |                          | 56                                        |
| 11-DF                      | 3.18                    | 40                 |                          | 40                                        |
| CC                         | 3.35                    | 40                 |                          | 34                                        |
| DHEA                       | 3.65                    | 40                 |                          | 25                                        |
| TES                        | 3.79                    | 40                 |                          | 21                                        |
| 17P                        | 3.84                    | 40                 |                          | 21                                        |
| DHT <sup>s</sup>           | 4.10                    | 40                 |                          | 22                                        |
| ANDRO                      | 4.35                    | 40                 |                          | 36                                        |
| 11-DOC                     | 4.35                    | 40                 |                          | 49                                        |
| PROG                       | 5.10                    | 40                 |                          | 107                                       |
| Negative ionization        |                         |                    |                          |                                           |
| DHEAS                      | 1.45                    | 60                 | 0.4                      | 92                                        |
| CL                         | 2.10                    | 40                 |                          | 47                                        |
| CN                         | 2.30                    | 30                 |                          | 27                                        |
| E2 quantifier <sup>s</sup> | 2.68                    | 40                 |                          | 45                                        |
| E2 qualifier               | 2.68                    | 40                 |                          | 30                                        |

§ Dwell times estimated by the sMRM calculator tool provided by Sciex with their Analyst software package.

**Table S4:** Calibration functions including slope and intercept, used regression model, and weighing factor and mean coefficient of correlation  $R^2$  of independent measurements of a set of calibrators in course of validation experiments (n=5) for 11-deoxycorticosterone (11-DOC), 11-deoxycortisol (11-DF), 17-OH-progesterone (17P), 21-deoxycortisol (21-DF), androstenedione (ANDRO), aldosterone (ALDO), corticosterone (CC), cortisol (CL), cortisone (CN), dehydroepiandrosterone (DHEA), dehydroepiandrosterone sulfate (DHEAS), dihydrotestosterone (DHT), estradiol (E2), progesterone (PROG), and testosterone (TES).

| Analyte | calibration<br>range<br>[nmol/L] | Regression | Weight           | a (intercept) | b<br>(slope) | c            | R <sup>2</sup> |
|---------|----------------------------------|------------|------------------|---------------|--------------|--------------|----------------|
|         |                                  |            |                  | Mean          | Mean         | Mean         | range          |
| 11-DOC  | 0.05–8.63                        | lin        | 1/x <sup>2</sup> | –0.000423     | 0.165        |              | 0.9993–0.9998  |
| 17P     | 0.18–41.60                       | quad       | 1/x <sup>2</sup> | 0.001326      | 0.075        | –0.0000647   | 0.9993–0.9998  |
| ANDRO   | 0.2–44.3                         | lin        | 1/x <sup>2</sup> | 0.000886      | 0.061        |              | 0.9997–0.9998  |
| DHEA    | 3.2–200.0                        | lin        | 1/x <sup>2</sup> | 0.015840      | 0.009        |              | 0.9971–0.9998  |
| DHT     | 0.165–5.97                       | lin        | 1/x <sup>2</sup> | 0.001129      | 0.278        |              | 0.9990–0.9998  |
| PROG    | 0.2–78.3                         | quad       | 1/x <sup>2</sup> | –0.000041     | 0.038        | –0.0000360   | 0.9993–1.0000  |
| TES     | 0.13–39.90                       | lin        | 1/x <sup>2</sup> | 0.000742      | 0.031        |              | 0.9988–0.9996  |
| 21-DF   | 0.06–13.7                        | lin        | 1/x <sup>2</sup> | 0.003806      | 0.117        |              | 0.9963–0.9998  |
| 11-DF   | 0.2–35.5                         | lin        | 1/x <sup>2</sup> | –0.000257     | 0.063        |              | 0.9992–0.9999  |
| CC      | 0.5–143.0                        | lin        | 1/x <sup>2</sup> | 0.001408      | 0.063        |              | 0.9985–0.9995  |
| DHEAS   | 160–15629                        | quad       | 1/x <sup>2</sup> | –0.005670     | 0.000        | 0.0000000043 | 0.9989–0.9993  |
| E2      | 0.015–19.0                       | lin        | 1/x <sup>2</sup> | 0.006110      | 1.216        |              | 0.9991–0.9999  |
| CL      | 14–782                           | quad       | 1/x <sup>2</sup> | 0.001674      | 0.007        | 0.000000632  | 0.9994–1.0000  |
| CN      | 1.1–111.0                        | lin        | 1/x <sup>2</sup> | 0.000236      | 0.029        |              | 0.9958–0.9994  |
| ALDO    | 0.058–7.10                       | lin        | 1/x <sup>2</sup> | 0.001994      | 0.186        |              | 0.9936–0.9995  |

**Table S5:** Limit of quantification, concentration and molecules on column and concentration of lowest calibration point for the quantifier and qualifier trace of 11-deoxycorticosterone (11-DOC), 11-deoxycortisol (11-DF), 17-OH-progesterone (17P), 21-deoxycortisol (21-DF), androstenedione (ANDRO), aldosterone (ALDO), corticosterone (CC), cortisol (CL), cortisone (CN), dehydroepiandrosterone (DHEA), dehydroepiandrosterone sulfate (DHEAS), dihydrotestosterone (DHT), estradiol (E2), progesterone (PROG), and testosterone (TES).. Substance amount on column was calculated from measured concentration, dilution in sample preparation, extraction efficiency and injection volume.

| Analyte | Quantifier |                    |                   | Qualifier |                   |
|---------|------------|--------------------|-------------------|-----------|-------------------|
|         | LLOQ       | On column amount * | Lowest calibrator | LLOQ      | Lowest calibrator |
|         | [nmol/L]   | [fmol]             | [nmol/L]          | [nmol/L]  | [nmol/L]          |
| ALDO    | 0.10       | 1.1                | 0.064             | 0.3       | 0.064             |
| ANDRO   | 0.10       | 1.1                | 0.18              | 0.10      | 0.182             |
| CC      | 0.50       | 5.6                | 0.50              | 0.50      | 0.50              |
| CL      | 15.0       | 169                | 13.9              | 15.0      | 13.9              |
| CN      | 1.0        | 11.2               | 1.15              | 1.0       | 1.15              |
| 11-DOC  | 0.05       | 0.56               | 0.05              | 0.20      | 0.046             |
| 11-DF   | 0.10       | 1.1                | 0.17              | 0.10      | 0.17              |
| 21-DF   | 0.10       | 1.1                | 0.06              | 0.20      | 0.06              |
| DHEA    | 5.0        | 56.2               | 3.43              | 5.0       | 3.43              |
| DHEAS   | 140        | 1575               | 140               | 140       | 140               |
| DHT     | 0.30       | 3.3                | 0.20              | 0.50      | 0.45              |
| E2      | 0.015      | 0.17               | 0.015             | 0.10      | 0.06              |
| 17P     | 0.10       | 1.1                | 0.17              | 0.10      | 0.17              |
| PROG    | 0.10       | 1.1                | 0.19              | 0.10      | 0.19              |
| TES     | 0.10       | 1.1                | 0.14              | 0.10      | 0.14              |

\* On column amount calculated from LLOQ in fmol/ $\mu$ L  $\times$  40 $\mu$ L injection volume / 3.2 for dilution in sample preparation  $\times$  90% (average absolute extraction recovery determined in pre/post spike experiment) / 100.

**Table S6:** Results for bias and precision measuring ERM human serum reference materials with IVD-CE certified calibration materials during assay validation. Mean values of inter-day measurements (n = 5) are compared with the target values (bias) and the inter-day measurement uncertainty (imprecision) was calculated.

| Analyte      | Parameter                         | Certified Human Serum Reference Material |                 |   |                  |
|--------------|-----------------------------------|------------------------------------------|-----------------|---|------------------|
|              |                                   | Low                                      | Medium          |   | High             |
| Testosterone | Sample Identifier:                | ERM DA-346a                              | -               | - | ERM DA-345a      |
|              | certified value $\pm$ SD [nmol/l] | 0.89 $\pm$ 0.12                          | -               | - | 19.09 $\pm$ 0.56 |
|              | found mean $\pm$ SD [nmol/l]      | 0.89 $\pm$ 0.04                          | -               | - | 19.55 $\pm$ 0.40 |
|              | bias / imprecision [%]            | -0.1 / 4.1                               | -               | - | 2.4 / 2.1        |
| Estradiol    | Sample Identifier:                | BCR-576                                  | BCR-577         |   | BCR-578          |
|              | certified value $\pm$ SD [nmol/l] | 0.114 $\pm$ 0.005                        | 0.69 $\pm$ 0.04 |   | 1.34 $\pm$ 0.07  |
|              | found mean $\pm$ SD [nmol/l]      | 0.120 $\pm$ 0.005                        | 0.74 $\pm$ 0.03 |   | 1.35 $\pm$ 0.08  |
|              | bias / imprecision [%]            | 4.9 / 4.7                                | 6.9 / 7.6       |   | 0.4 / 4.2        |
| Cortisol     | Sample Identifier:                | ERM-DA192                                | -               | - | ERM-DA193        |
|              | certified value $\pm$ SD [nmol/l] | 273 $\pm$ 6                              | -               | - | 763 $\pm$ 14     |
|              | found mean $\pm$ SD [nmol/l]      | 293 $\pm$ 4                              | -               | - | 814 $\pm$ 21     |
|              | bias / imprecision [%]            | 7.5 / 1.4                                | -               | - | 6.7 / 2.5        |
| Progesterone | Sample Identifier:                | ERM DA-347                               | -               | - | BCR-348R         |
|              | certified value $\pm$ SD [nmol/l] | 10.1 $\pm$ 0.2                           | -               | - | 26.9 $\pm$ 1.2   |
|              | found mean $\pm$ SD [nmol/l]      | 11.3 $\pm$ 0.1                           | -               | - | 30.0 $\pm$ 0.4   |
|              | bias / imprecision [%]            | 11.5 / 1.1                               | -               | - | 11.6 / 1.4       |

**Table S7:** Mean bias and z-values from taking part in the UK NEQAS steroids proficiency testing scheme from distribution 470 to 493 (12/2019–01/2022) and average CV and n of the group mean used as target value for 17-OH-progesterone (17P), androstenedione (ANDRO), aldosterone (ALDO), cortisol (CL), dehydroepiandrosterone (DHEA), dehydroepiandrosterone sulfate (DHEAS), estradiol (E2), progesterone (PROG), and testosterone (TES).

| Parameter            | Risch laboratory |        |    |         |     |    | Group mean average statistics |     |
|----------------------|------------------|--------|----|---------|-----|----|-------------------------------|-----|
|                      | Bias             |        |    | Z-score |     |    | CV                            | n   |
|                      | Mean [%]         | SD [%] | n  | Mean    | SD  | n  |                               |     |
| CL, serum            | 4.5              | 5.2    | 80 | 0.7     | 0.8 | 80 | 7.3                           | 16  |
| CL, urine            | 4.9              | 10.4   | 52 | 0.4     | 1.1 | 52 | 18.5                          | 49  |
| 17P                  | -1.7             | 5.7    | 80 | -0.1    | 0.4 | 80 | 12.7                          | 49  |
| PROG, <i>ALTM</i>    | -0.4             | 18.9   | 80 | 0.3     | 0.7 | 80 | 14.1                          | 238 |
| PROG, <i>MS</i>      | 9.8              | 8.1    | 78 | 1.2     | 1.2 | 19 | 13.4                          | 3   |
| E2, <i>ALTM</i>      | -9.5             | 15.4   | 77 | -0.5    | 0.9 | 77 | 14.7                          | 219 |
| E2, <i>MS</i>        | 2.7              | 8.4    | 77 | 0.4     | 0.8 | 77 | 10.6                          | 13  |
| E2-high, <i>ALTM</i> | -1.5             | 9.2    | 76 | -0.2    | 1.0 | 76 | 10.6                          | 103 |
| E2-high, <i>MS</i>   | 4.6              | 5.3    | 79 | 0.5     | 5.3 | 21 | 13.0                          | 4   |
| TES, female          | 1.1              | 4.8    | 72 | 0.2     | 0.6 | 72 | 8.8                           | 53  |
| TES, male            | 0.8              | 3.8    | 72 | 0.1     | 0.6 | 72 | 6.5                           | 38  |
| ANDRO                | -4.9             | 5.2    | 80 | -0.5    | 0.6 | 80 | 9.5                           | 49  |
| DHEAS                | 3.8              | 4.2    | 80 | 0.5     | 0.5 | 80 | 7.7                           | 20  |
| ALDO                 | -2.3             | 17.6   | 62 | -0.1    | 1.0 | 62 | 17.5                          | 17  |

*ALTM* all methods trimmed mean as target, *MS* LC-MS group mean as target

**Table S8:** Mean recovery at three different spike concentration levels (n=3) for 11-deoxycorticosterone (11-DOC), 11-deoxycortisol (11-DF), 17-OH-progesterone (17P), 21-deoxycortisol (21-DF), androstenedione (ANDRO), aldosterone (ALDO), corticosterone (CC), cortisol (CL), cortisone (CN), dehydroepiandrosterone (DHEA), dehydroepiandrosterone sulfate (DHEAS), dihydrotestosterone (DHT), estradiol (E2), progesterone (PROG), and testosterone (TES).

| Analyte | Low level      |              |        | Medium level   |              |        | High level     |              |        |
|---------|----------------|--------------|--------|----------------|--------------|--------|----------------|--------------|--------|
|         | Spike [nmol/L] | Recovery [%] | SD [%] | Spike [nmol/L] | Recovery [%] | SD [%] | Spike [nmol/L] | Recovery [%] | SD [%] |
| 11-DOC  | 0.30           | 92.6         | 7.2    | 0.61           | 91.1         | 4.5    | 2.42           | 89.5         | 3.6    |
| 17P     | 2.27           | 99.7         | 1.1    | 4.54           | 99.0         | 1.1    | 18.16          | 97.6         | 2.2    |
| ANDRO   | 2.62           | 98.9         | 3.5    | 5.24           | 99.0         | 3.4    | 20.95          | 99.4         | 2.0    |
| DHEA    | 34.7           | 96.1         | 1.9    | 69.3           | 96.3         | 2.2    | 277.4          | 94.1         | 2.4    |
| DHT     | 0.344          | 94.0         | 7.6    | 0.689          | 94.4         | 6.5    | 2.754          | 95.7         | 5.6    |
| PROG    | 8.0            | 106.7        | 2.4    | 15.9           | 106.0        | 5.0    | 63.6           | 103.5        | 2.9    |
| TES     | 0.87           | 104.1        | 7.6    | 1.73           | 106.5        | 5.4    | 6.93           | 105.3        | 1.5    |
| 21-DF   | 0.29           | 96.1         | 4.1    | 0.58           | 95.2         | 5.9    | 2.31           | 90.7         | 1.3    |
| 11-DF   | 1.44           | 120.8        | 4.4    | 2.89           | 118.8        | 4.1    | 11.55          | 107.7        | 4.8    |
| CC      | 11.5           | 106.4        | 2.9    | 23.1           | 105.1        | 4.0    | 92.4           | 97.7         | 4.5    |
| DHEAS   | 1916           | 105.0        | 3.4    | 3832           | 103.7        | 2.9    | 15326          | 90.3         | 2.9    |
| E2      | 0.092          | 112.8        | 3.5    | 0.184          | 112.2        | 3.3    | 0.734          | 110.5        | 3.0    |
| CL      | 207            | 99.9         | 3.2    | 414            | 97.5         | 2.8    | 828            | 93.0         | 2.8    |
| CN      | 13.9           | 87.7         | 9.2    | 27.7           | 87.5         | 6.8    | 55.5           | 88.8         | 4.3    |
| ALDO    | 0.277          | 108.6        | 9.7    | 0.555          | 106.6        | 3.5    | 2.220          | 107.0        | 2.2    |



**Table S9:** Glycerophospholipid compounds monitored during optimization of sample preparation and their respective LC-MS/MS parameters.

| Compound     | Mass  | Q1    | Q3    | DP  | CE |
|--------------|-------|-------|-------|-----|----|
|              | g/mol | m/z   | m/z   | V   | V  |
| 16:0 Lyso-PC | 495.6 | 496.5 | 184.1 | 85  | 40 |
| 18:1 Lyso-PC | 523.7 | 522.5 | 184.1 | 85  | 40 |
| 18:0 Lyso-PC | 521.7 | 524.5 | 184.1 | 80  | 40 |
| 12:0 PC      | 621.8 | 622.5 | 184.1 | 90  | 40 |
| 16:0 PC      | 734.0 | 734.7 | 184.1 | 90  | 40 |
| 16:0 18:2 PC | 758.1 | 758.7 | 184.1 | 100 | 40 |
| 16:0 18:1 PC | 760.1 | 760.5 | 184.1 | 105 | 40 |
| 18:0 PC      | 790.1 | 790.8 | 184.1 | 100 | 40 |
| 20:0 PC      | 846.3 | 846.8 | 184.1 | 90  | 40 |

**Table S10:** Matrix effect (ME), extraction recovery (ER) and process efficiency (PE) and according standard deviations (SD) as determined in the pre-post spiking experiment at two concentration levels of 11-deoxycorticosterone (11-DOC), 11-deoxycortisol (11-DF), 17-OH-progesterone (17P), 21-deoxycortisol (21-DF), androstenedione (ANDRO), aldosterone (ALDO), corticosterone (CC), cortisol (CL), cortisone (CN), dehydroepiandrosterone (DHEA), dehydroepiandrosterone sulfate (DHEAS), dihydrotestosterone (DHT), estradiol (E2), progesterone (PROG), and testosterone (TES). Calculated based on Analyte Peak Area and on Area Ratio (n = 6). For the extraction recovery post-spiked IS peak area was used for normalization correcting only for the instrumental part of the analysis process.

| Analyte | Spike Level | Analyte Peak Area |      |      |     |      |      | Area Ratio |      |         |     |       |      |
|---------|-------------|-------------------|------|------|-----|------|------|------------|------|---------|-----|-------|------|
|         |             | ME                | SD   | ER   | SD  | PE   | SD   | IS         |      | Post IS |     | IS    |      |
|         |             |                   |      |      |     |      |      | norm.      | SD   | norm.   | SD  | norm. | SD   |
|         |             |                   |      |      |     |      |      | ME         |      | ER      |     | PE    |      |
|         |             | [%]               | [%]  | [%]  | [%] | [%]  | [%]  | [%]        | [%]  | [%]     | [%] | [%]   | [%]  |
| 11-DOC  | Low         | 82.4              | 2.8  | 83.1 | 4.8 | 63.2 | 2.1  | 102.4      | 4.9  | 85.3    | 4.5 | 100.6 | 2.7  |
|         | High        | 84.5              | 2.2  | 74.6 | 1.9 | 62.1 | 2.7  | 104.9      | 2.9  | 78.6    | 3.0 | 98.8  | 1.4  |
| 17P     | Low         | 65.2              | 5.3  | 99.1 | 2.9 | 64.3 | 4.0  | 98.7       | 6.1  | 97.9    | 2.2 | 99.7  | 3.0  |
|         | High        | 65.4              | 3.9  | 95.7 | 2.1 | 62.3 | 3.9  | 99.0       | 3.0  | 97.2    | 4.9 | 96.7  | 2.7  |
| ANDRO   | Low         | 74.7              | 3.9  | 96.4 | 3.5 | 70.5 | 5.0  | 99.7       | 7.0  | 100.0   | 3.3 | 98.5  | 6.2  |
|         | High        | 73.4              | 2.7  | 92.8 | 2.1 | 67.5 | 2.6  | 97.9       | 2.6  | 95.7    | 4.3 | 94.3  | 0.9  |
| DHEA    | Low         | 61.2              | 4.9  | 96.6 | 6.8 | 58.8 | 4.0  | 100.1      | 5.3  | 94.7    | 7.6 | 103.0 | 6.4  |
|         | High        | 66.0              | 5.2  | 92.0 | 2.7 | 60.5 | 4.2  | 107.8      | 4.2  | 93.7    | 5.0 | 105.7 | 3.2  |
| DHT     | Low         | 55.1              | 5.4  | 95.8 | 2.1 | 51.8 | 5.3  | 88.4       | 5.3  | 91.1    | 2.8 | 90.7  | 7.0  |
|         | High        | 55.1              | 3.5  | 92.7 | 2.8 | 50.9 | 3.8  | 88.5       | 2.2  | 95.1    | 4.9 | 89.1  | 1.7  |
| PROG    | Low         | 99.4              | 7.8  | 91.2 | 2.2 | 88.3 | 4.1  | 101.4      | 6.3  | 92.0    | 1.8 | 100.7 | 1.6  |
|         | High        | 97.3              | 4.3  | 87.3 | 3.5 | 84.3 | 3.0  | 99.3       | 2.8  | 90.2    | 3.7 | 96.3  | 2.1  |
| TES     | Low         | 84.6              | 19.7 | 97.5 | 0.8 | 69.6 | 17.0 | 100.4      | 26.7 | 98.9    | 1.6 | 86.6  | 22.5 |
|         | High        | 81.7              | 4.1  | 96.0 | 1.4 | 76.0 | 6.4  | 96.4       | 4.0  | 98.9    | 4.2 | 94.1  | 6.4  |
| 21-DF   | Low         | 45.8              | 4.9  | 98.2 | 3.9 | 44.8 | 3.9  | 97.8       | 5.2  | 101.7   | 5.4 | 96.6  | 3.2  |
|         | High        | 45.6              | 3.0  | 98.8 | 1.1 | 45.1 | 3.2  | 97.7       | 4.4  | 101.8   | 4.5 | 97.3  | 3.9  |
| 11-DF   | Low         | 68.5              | 2.9  | 96.5 | 2.7 | 64.6 | 3.0  | 98.7       | 3.8  | 95.1    | 2.6 | 101.0 | 2.1  |
|         | High        | 68.3              | 3.1  | 90.7 | 1.5 | 61.5 | 3.1  | 98.4       | 2.2  | 93.2    | 4.0 | 96.1  | 1.6  |
| CC      | Low         | 67.6              | 6.6  | 95.0 | 4.2 | 60.1 | 3.4  | 94.9       | 10.2 | 94.7    | 7.4 | 102.8 | 4.3  |
|         | High        | 69.0              | 3.2  | 83.0 | 2.2 | 55.2 | 3.9  | 96.6       | 1.7  | 85.7    | 2.9 | 94.3  | 1.7  |
| DHEAS   | Low         | 119.0             | 18.8 | 92.6 | 2.9 | 93.9 | 10.9 | 125.6      | 21.1 | 94.2    | 3.2 | 118.5 | 12.8 |
|         | High        | 98.9              | 4.0  | 85.7 | 2.0 | 81.0 | 1.6  | 104.3      | 4.8  | 91.1    | 3.5 | 102.4 | 1.0  |
| E2      | Low         | 100.6             | 1.2  | 85.9 | 0.4 | 86.2 | 0.7  | 96.2       | 1.9  | 86.1    | 2.1 | 96.5  | 0.6  |
|         | High        | 100.9             | 1.4  | 85.9 | 1.7 | 86.6 | 1.2  | 96.5       | 2.1  | 89.1    | 2.7 | 97.0  | 1.2  |
| CL      | Low         | 71.4              | 15.2 | 97.7 | 1.6 | 58.5 | 6.4  | 93.1       | 20.0 | 97.4    | 3.7 | 83.8  | 8.4  |
|         | High        | 75.7              | 1.0  | 93.3 | 1.2 | 67.0 | 2.0  | 98.8       | 2.5  | 97.2    | 2.7 | 96.1  | 2.7  |
| CN      | Low         | 70.6              | 19.8 | 97.8 | 1.4 | 53.0 | 13.5 | 85.9       | 23.4 | 97.0    | 3.7 | 68.9  | 17.0 |
|         | High        | 78.6              | 0.9  | 92.7 | 1.3 | 67.4 | 2.7  | 95.9       | 2.0  | 95.5    | 2.7 | 87.5  | 3.2  |
| ALDO    | Low         | 60.4              | 3.0  | 88.5 | 2.3 | 49.4 | 2.8  | 109.8      | 7.3  | 87.2    | 2.7 | 106.3 | 7.0  |
|         | High        | 55.4              | 2.7  | 82.0 | 2.7 | 44.8 | 3.6  | 100.6      | 2.8  | 84.1    | 3.6 | 96.1  | 3.0  |

**Table S11:** Results from screening steroid compounds in pure solution as possible isobaric interferents. The retention time (RT) of each compound is compared to the RTs of isobaric analytes and all ion transitions that produced a signal are listed.

| Compound             | Structure                                                                           | M<br>[g/mol] | RT<br>[min] | Isobar of<br>analyte (RT<br>[min]) | Found in ion<br>transitions [m/z]               |
|----------------------|-------------------------------------------------------------------------------------|--------------|-------------|------------------------------------|-------------------------------------------------|
| Trenbolone           | 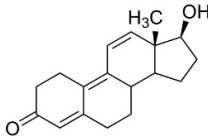   | 270.37       | 3.60        | E2 (2.68)§                         | 271→145/183 (-)<br>271→199 (+)‡<br>269→145 (-)‡ |
| Norandrostenedione   |    | 272.37       | 4.20        | E2 (2.68)                          | 271→145/183 (-)<br>273→109 (+)‡                 |
| 17-alpha-estradiol   |    | 272.38       | 2.63        | E2 (2.68)                          | 271→145/183                                     |
| Estrone              |    | 270.37       | 3.50        | E2 (2.68)§                         | 271→145/183<br>269→145‡                         |
| Estriol              |   | 288.38       | 1.30        | DHEA<br>(3.65)<br>TES (3.84)       | 289→213/253                                     |
| Epitestosterone      |  | 288.42       | 3.75        | DHEA<br>(3.65)<br>TES (3.84)       | 289→97/109<br>289→213/253                       |
| Etiocholanolone      |  | 290.44       | 3.95        | DHT (4.10)                         | 291 → 255/159<br>273 → 255‡                     |
| Epiandrosterone      |  | 290.44       | 3.90        | DHT                                | 291→255/159<br>273→255/161/147‡                 |
| Androsterone         |  | 290.44       | 3.90        | DHT                                | 291→255/159<br>273→255/161/147‡                 |
| Testosterone acetate |  | 330.46       | 5.15        | 17P (3.84)<br>11-DOC<br>(4.35)     | 331 → 97/109                                    |
| Prednisone           |  | 358.43       | 2.25        | CN (2.35) §<br>ALDO<br>(2.75)§     |                                                 |

| Compound                 | Structure | M<br>[g/mol] | RT<br>[min] | Isobar of<br>analyte (RT<br>[min])        | Found in ion<br>transitions [m/z]                            |
|--------------------------|-----------|--------------|-------------|-------------------------------------------|--------------------------------------------------------------|
| Prednisolone             |           | 360.44       | 2.05        | CL (2.10)§<br>CN (2.35)<br>ALDO<br>(2.75) |                                                              |
| 18-OH-<br>Corticosterone |           | 362.46       | 2.25        | CL (2.10)                                 | 363→269 (+)‡<br>no signal in<br>negative ion traces<br>of CL |
| Dexamethasone            |           | 396.46       | 2.40        | 21-DF-<br>d8(2.45)†                       | 355→319<br>393→147‡                                          |

§ M+2 isotope as potential isobaric interference (e.g., <sup>13</sup>C<sub>2</sub> isotope)

† Isobaric interference caused by in-source fragmentation

‡ Specific ion transitions of the respective compound, not included in the assay

(+), (-) positive or negative ionization

**Table S12:** Accuracy in quality control samples of 11-deoxycorticosterone (11-DOC), 11-deoxycortisol (11-DF), 17-OH-progesterone (17P), 21-deoxycortisol (21-DF), androstenedione (ANDRO), aldosterone (ALDO), corticosterone (CC), cortisol (CL), cortisone (CN), dehydroepiandrosterone (DHEA), dehydroepiandrosterone sulfate (DHEAS), dihydrotestosterone (DHT), estradiol (E2), progesterone (PROG), and testosterone (TES) spiked with a mix of 13 potential steroidal interference compounds at concentration of 100 ng/mL or 1000 ng/mL.

Analyte results ±15% off target are bolded.

| Analyte      | QC-I            |                | QC-II          |                | QC-III        |               |
|--------------|-----------------|----------------|----------------|----------------|---------------|---------------|
|              | QN<br>[%]       | QL<br>[%]      | QN<br>[%]      | QL<br>[%]      | QN<br>[%]     | QL<br>[%]     |
| 11-DOC       | 101.0           | 99.6           | 99.6           | 99.8           | 101.0         | 101.0         |
| 17P          | 99.3            | 99.5           | 98.1           | 97.2           | 93.5          | 93.9          |
| <b>ANDRO</b> | <b>249.0</b>    | <b>250.0</b>   | <b>127.0</b>   | <b>128.0</b>   | 96.5          | 95.5          |
| <b>DHEA</b>  | <b>81.8</b>     | <b>44200.0</b> | 91.1           | <b>7690.0</b>  | 97.6          | 93.0          |
| DHT          | 103.0           | 95.0           | 98.1           | 109.0          | 96.9          | 93.7          |
| PROG         | 98.2            | 97.9           | 99.7           | 100.0          | 95.9          | 94.1          |
| <b>TES</b>   | <b>138.0</b>    | <b>13700.0</b> | 90.9           | 94.1           | 95.8          | 96.7          |
| <b>21-DF</b> | <b>58.6</b>     | <b>67.7</b>    | <b>49.8</b>    | <b>52.5</b>    | <b>46.5</b>   | <b>45.5</b>   |
| 11-DF        | 98.2            | 98.0           | 85.6           | 86.0           | 102.0         | 101.0         |
| CC           | 101.0           | 93.8           | 97.4           | 96.3           | 96.0          | 97.2          |
| DHEAS        | 96.7            | 99.7           | 100.0          | 101.0          | 98.2          | 93.9          |
| <b>E2</b>    | <b>180000.0</b> | <b>59100.0</b> | <b>34000.0</b> | <b>11700.0</b> | <b>6000.0</b> | <b>2080.0</b> |
| CL           | 106.0           | 101.0          | 103.0          | 101.0          | 103.0         | 105.0         |
| CN           | 103.0           | 96.0           | 98.2           | 90.9           | 96.7          | 98.0          |
| ALDO         | 109.0           | 98.1           | 98.5           | 98.4           | 104.0         | 104.0         |

**Table S13:** Materials—consumables.

| Type                                      | Material                                                             | Producer                   | Order Nr.                              |
|-------------------------------------------|----------------------------------------------------------------------|----------------------------|----------------------------------------|
| Pipette tips                              | Combitips advanced (0.5 mL,<br>5.0 mL und 10 mL)                     | Eppendorf                  | 0030089421<br>0030089456<br>0030089464 |
| Pipette tips                              | Eppendorf epT.I.P.S.®<br>(50–1000 µL, 2–200 µL,<br>100–5000 µL)      | Eppendorf                  | 0030075234<br>0030075250<br>0030075293 |
| Tubes                                     | Eppendorf tubes 3810X<br>1.5 mL, colorless, PP                       | Eppendorf                  | 0030125.150                            |
| Tubes                                     | Eppendorf Safe-Lock tubes<br>2.0 mL, colorless, PP                   | Eppendorf                  | 0030 123.344                           |
| Tubes                                     | Sample tubes 11.5 mL,<br>100 × 15.7 mm, PS                           | Sarstedt                   | 55.466                                 |
| LC vials                                  | 2 mL crimp-snap vials, glass,<br>brown, 2 mL                         | WICOM                      | WIC42730                               |
| Snap caps                                 | PP, FEP/butylgum septum                                              | WICOM                      | WIC44760/R                             |
| Micro insert                              | 300 µL, glass                                                        | WICOM                      | WIC47000                               |
| Phospholipid removal<br>filter cartridges | HybridSPE Phospholipid<br>Cartridge, 30mg bed weight, 1 mL<br>volume | Supelco / Sigma<br>Aldrich | 55261-U<br>(100 pcs)                   |

**Table S14:** Materials—ISO17034 certified reference materials as solutions.

| Analyte                 | Vendor     | Identifier | Concentration | Solvent      |
|-------------------------|------------|------------|---------------|--------------|
| Aldosterone             | Cerilliant | A-096      | 100 µg/ml     | Acetonitrile |
| Androstenedione         | Cerilliant | A-075      | 1 mg/ml       | Acetonitrile |
| Corticosterone          | Cerilliant | C-117      | 1 mg/ml       | Methanol     |
| Cortisol                | Cerilliant | C-106      | 1 mg/ml       | Methanol     |
| Cortisone               | Cerilliant | C-130      | 100 µg/ml     | Methanol     |
| 11-Deoxycorticosterone  | Cerilliant | D-061      | 100 µg/ml     | Methanol     |
| 11-Deoxycortisol        | Cerilliant | D-061      | 1 mg/ml       | Methanol     |
| 21-Deoxycortisol        | Cerilliant | D-062      | 100 µg/ml     | Methanol     |
| DHEA                    | Cerilliant | D-063      | 1 mg/ml       | Methanol     |
| DHEAS                   | Cerilliant | D-065      | 1 mg/ml       | Methanol     |
| Dihydrotestosterone     | Cerilliant | D-073      | 1 mg/ml       | Methanol     |
| 17α-Hydroxyprogesterone | Cerilliant | H-085      | 1 mg/ml       | Methanol     |
| 17β-Estradiol           | Cerilliant | E-060      | 1 mg/ml       | Acetonitrile |
| Progesterone            | Cerilliant | P-069      | 1 mg/ml       | Acetonitrile |
| Testosterone            | Cerilliant | T-037      | 1 mg/ml       | Acetonitrile |

**Table S15:** Substances purchased for interference checks.

| Analyte                  | Vendor        | Identifier       | Properties                     |
|--------------------------|---------------|------------------|--------------------------------|
| Dexamethasone            | Cerilliant    | D-085            | 1 mg/mL solution in methanol   |
| 18-Hydroxycorticosterone | Cerilliant    | H-106            | 100 µg/mL in 90 % acetonitrile |
| Trenbolone               | Cerilliant    | T-043            | 1 mg/mL in acetonitrile        |
| Estrone                  | Cerilliant    | E-075            | 1 mg/mL in methanol            |
| Estriol                  | Cerilliant    | E-074            | 1 mg/mL in methanol            |
| Epitestosterone          | Cerilliant    | E-058            | 1 mg/mL in acetonitrile        |
| Etiocholanone            | Sigma Aldrich | 32833            | 100 µg/mL in acetonitrile      |
| Testosterone acetate     | Sigma Aldrich | 32676            | 100 µg/mL in acetonitrile      |
| Norandrostenedione       | LGC           | LGCAMP0660.01-11 | 1 mg/mL in acetonitrile        |
| 17α-estradiol            | Sigma Aldrich | E8750            | Neat substance                 |
| Epiandrosterone          | LGC           | CDX-00005120-250 | Neat substance                 |
| Prednisolone             | Sigma Aldrich | 46656-250mg      | Neat substance                 |
| Prednisone               | Sigma Aldrich | P2900000         | Neat substance                 |

**Table S16:** Target spiking concentrations for 11-deoxycorticosterone (11-DOC), 11-deoxycortisol (11-DF), 17-OH-progesterone (17P), 21-deoxycortisol (21-DF), androstenedione (ANDRO), aldosterone (ALDO), corticosterone (CC), cortisol (CL), cortisone (CN), dehydroepiandrosterone (DHEA), dehydroepiandrosterone sulfate (DHEAS), dihydrotestosterone (DHT), estradiol (E2), progesterone (PROG), and testosterone (TES). of samples used for the determination of recovery and matrix effect.

|        | Recovery (RSS)  |                    |                  | Matrix effects (ASS) |                  |
|--------|-----------------|--------------------|------------------|----------------------|------------------|
|        | Low<br>[nmol/L] | Medium<br>[nmol/L] | High<br>[nmol/L] | Low<br>[nmol/L]      | High<br>[nmol/L] |
| 11-DOC | 0.303           | 0.605              | 2.421            | 0.25                 | 2.52             |
| 11-DF  | 1.44            | 2.89               | 11.55            | 1.20                 | 12.0             |
| 17P    | 2.27            | 4.54               | 18.16            | 1.26                 | 12.6             |
| 21-DF  | 0.29            | 0.58               | 2.31             | 3.61                 | 36.1             |
| ALDO   | 0.277           | 0.555              | 2.220            | 2.31                 | 23.12            |
| ANDRO  | 2.62            | 5.24               | 20.95            | 1.16                 | 11.6             |
| CC     | 11.55           | 23.09              | 92.36            | 4.81                 | 48.1             |
| CL     | 207             | 414                | 828              | 34.5                 | 345              |
| CN     | 13.9            | 27.7               | 55.5             | 4.6                  | 46.2             |
| DHEA   | 34.7            | 69.3               | 277.4            | 14.4                 | 144.4            |
| DHEAS  | 1916            | 3832               | 15326            | 426                  | 4257             |
| DHT    | 0.344           | 0.689              | 2.754            | 0.57                 | 5.74             |
| E2     | 0.092           | 0.184              | 0.734            | 0.31                 | 3.06             |
| PROG   | 7.95            | 15.90              | 63.60            | 2.12                 | 21.2             |
| TES    | 0.87            | 1.73               | 6.93             | 0.58                 | 5.78             |

**Table S17:** Spiking scheme for the preparation of sample sets for assessment of matrix effects and extraction recovery.

| <b>Spike</b> | <b>Set A</b>                  | <b>Set B</b>               | <b>Set C</b>              | <b>Set D</b>             | <b>Set E</b>                 |
|--------------|-------------------------------|----------------------------|---------------------------|--------------------------|------------------------------|
|              | <b>"blank-matrix"</b><br>[μL] | <b>"post-post"</b><br>[μL] | <b>"pre-post"</b><br>[μL] | <b>"pre-pre"</b><br>[μL] | <b>"blank-spike"</b><br>[μL] |
| Pre          |                               |                            |                           |                          |                              |
| Sample       | 0                             | 100                        | 100                       | 100                      | 100                          |
| PPT          | 0                             | 200                        | 200                       | 200                      | 200                          |
| ISS          | 20                            | 0                          | 0                         | 20                       | 0                            |
| ASS          | 20                            | 0                          | 20                        | 20                       | 0                            |
| Blank        | 300                           | 0                          | 0                         | 0                        | 40                           |
| Post         |                               |                            |                           |                          |                              |
| Eluate       | -                             | 150                        | 160                       | 170                      | 170                          |
| ISS          | -                             | 10                         | 10                        | 0                        | 0                            |
| ASS          | -                             | 10                         | 0                         | 0                        | 0                            |

**Table S18:** Details and performance data provided by the manufacturers of immunoassays which are currently in use by Dr. Risch laboratories for 17-OH-progesterone (17P), androstenedione (ANDRO), cortisol (CL), dehydroepiandrosterone (DHEA), dehydroepiandrosterone sulfate (DHEAS), estradiol (E2), progesterone (PROG), and testosterone (TES).

| Analytes                | CL            | DHEAS         | E2                           | PROG     | TES      | ANDRO    | 17P        | DHEA <sup>1</sup> |
|-------------------------|---------------|---------------|------------------------------|----------|----------|----------|------------|-------------------|
| Platform                |               |               | Roche                        |          |          | Siemens  | IDS        | Demeditec         |
|                         |               |               | Elecsys Cobas e411/e601/e602 |          |          | Immulite | iSYS       | ---               |
| Principle               | ECLIA         | ECLIA         | ECLIA                        | ECLIA    | ECLIA    | CLIA     | CLIA       | ELISA             |
| LOD [nmol/l]            | 1.5           | 5             | 0.018                        | 0.087    | 0.087    | n.a.     | 0.45       | 0.3               |
| LLOQ [nmol/l]           | 3.0           | 81            | 0.092                        | 0.636    | 0.416    | 1.1      | 0.9        | 1.0               |
| ULOQ [nmol/l]           | 1750          | 27,100        | 11.010                       | 191.0    | 52.0     | 35       | 48.5       | 104.2             |
| with dilution (factor)  | 17,500 (1:10) | 135,700 (1:5) | 110.1 (1:10)                 | n.a.     | n.a.     | n.a.     | 97.0 (1:2) | n.a.              |
| Repeatability CV %      | 1.6–1.7       | 1.5–3.2       | 1.1–8.5                      | 1.9–5.3  | 1.2–8.9  | 6.2–15.1 | 1.2–5.3    | 6.4–8.2           |
| Intermediate Prec. CV % | 1.9–2.3       | 2.2–4.7       | 1.9–11.9                     | 3.2–10.4 | 1.6–14.5 | 8.5–17.8 | 3.9–11.1   | 4.7–10.3          |

<sup>1</sup> External partner laboratory
